# Supplementary material for: Noninvasive Delineation of Glioma Infiltration with Combined 7T Chemical Exchange Saturation Transfer Imaging and MR Spectroscopy: A Diagnostic Accuracy Study
Source: MDPI journal article supplement (doi:10.3390/metabo12100901), 2022-09-24
Supplement: s1 [file s1]

Supplemental Table S4. The values of CEST, MRS, FET and tumor probabilities of the three biopsy regions in Figure 5.

|                  | <b>Red Region</b> |            | <b>Yellow Region</b> |            | <b>Green Region</b> |            |
|------------------|-------------------|------------|----------------------|------------|---------------------|------------|
|                  | <b>Median</b>     | <b>Std</b> | <b>Median</b>        | <b>Std</b> | <b>Median</b>       | <b>Std</b> |
| <b>Model (%)</b> | 64.500            | 15.536     | 14.000               | 5.758      | 0.000               | 3.024      |
| <b>CEST (%)</b>  | 4.830             | 0.407      | 3.880                | 0.412      | 4.230               | 0.248      |
| <b>FET (SUV)</b> | 3.580             | 0.089      | 1.625                | 0.642      | 0.770               | 0.083      |
| <b>MRS (CNR)</b> | 3.770             | 0.598      | 2.280                | 0.797      | 0.000               | 0.321      |

Std: standard deviation.
