# Supplementary material for: Noninvasive Delineation of Glioma Infiltration with Combined 7T Chemical Exchange Saturation Transfer Imaging and MR Spectroscopy: A Diagnostic Accuracy Study
Source: MDPI journal article supplement (doi:10.3390/metabo12100901), 2022-09-24
Supplement: s1 [file s1]

Supplemental Table S2. Regression model for combination of CEST and MRS.

| <b>ANOVA: CEST and MRS</b>                          |            |            |            |          |                |
|-----------------------------------------------------|------------|------------|------------|----------|----------------|
|                                                     | <b>df</b>  | <b>SS</b>  | <b>MS</b>  | <b>F</b> | <b>p-value</b> |
| <b>Regression</b>                                   | 2          | 168.237    | 84.119     | 344.132  | <0.001         |
| <b>Residual</b>                                     | 769        | 187.972    | 0.244      |          |                |
| <b>Total</b>                                        | 771        | 356.209    |            |          |                |
| <b>ANOVA: MRS</b>                                   |            |            |            |          |                |
|                                                     | <b>df</b>  | <b>SS</b>  | <b>MS</b>  | <b>F</b> | <b>p-value</b> |
| <b>Regression</b>                                   | 1          | 109.872    | 109.872    | 343.436  | <0.001         |
| <b>Residual</b>                                     | 770        | 246.337    | 0.320      |          |                |
| <b>Total</b>                                        | 771        | 356.209    |            |          |                |
| <b>Add CEST as a new variable can improve model</b> |            |            |            |          |                |
|                                                     | <b>dfE</b> | <b>SSE</b> | <b>MSE</b> | <b>F</b> | <b>p-value</b> |
| <b>Full model (CEST and MRS)</b>                    | 769        | 187.972    | 0.244      | 238.776  | <0.001         |
| <b>Single variable model (MRS)</b>                  | 770        | 246.337    |            |          |                |

ANOVA: Analysis of Variance. df: degree of freedom. SS: Sum of Squares. MS: Mean Square. dfE: degree of freedom error. SSE: Sum of Squares due to Error. MSE: Mean Square Error
