# Supplementary material for: Noninvasive Delineation of Glioma Infiltration with Combined 7T Chemical Exchange Saturation Transfer Imaging and MR Spectroscopy: A Diagnostic Accuracy Study
Source: MDPI journal article supplement (doi:10.3390/metabo12100901), 2022-09-24
Supplement: s1 [file s1]

Supplemental Table S3. Parameters of the ROC curves in Figure 4.

|          |                            | <b>AUC</b> | <b>95%C.I.</b> |       | <b>p-value</b> |
|----------|----------------------------|------------|----------------|-------|----------------|
| <b>A</b> | <b>MRS</b>                 | 0.888      | 0.885          | 0.891 | <0.001         |
|          | <b>APT-CEST</b>            | 0.812      | 0.808          | 0.814 | <0.001         |
|          | <b>Com (MRS, APT-CEST)</b> | 0.910      | 0.907          | 0.913 | <0.001         |
| <b>B</b> | <b>MRS</b>                 | 0.778      | 0.773          | 0.783 | <0.001         |
|          | <b>APT-CEST</b>            | 0.810      | 0.805          | 0.814 | <0.001         |
|          | <b>Com (MRS, APT-CEST)</b> | 0.845      | 0.841          | 0.849 | <0.001         |
| <b>C</b> | <b>MRS</b>                 | 0.844      | 0.837          | 0.852 | <0.001         |
|          | <b>APT-CEST</b>            | 0.849      | 0.842          | 0.856 | <0.001         |
|          | <b>Com (MRS, APT-CEST)</b> | 0.869      | 0.862          | 0.875 | <0.001         |

Com: combine. AUC: Area under curve. C.I.: confidence interval.
