# Supplementary material for: Noninvasive Delineation of Glioma Infiltration with Combined 7T Chemical Exchange Saturation Transfer Imaging and MR Spectroscopy: A Diagnostic Accuracy Study
Source: MDPI journal article supplement (doi:10.3390/metabo12100901), 2022-09-24
Supplement: s1 [file s1]

Supplemental Table S1. Analyses of interobserver agreement. ( $k < 0$ , poor agreement;  $k = 0-0.20$ , slight agreement;  $k = 0.21-0.40$ , fair agreement;  $k = 0.41-0.60$ , moderate agreement;  $k = 0.61-0.80$ , substantial agreement;  $k = 0.81-1.00$ , almost perfect agreement)

|             |              | Neurosurgeon |       | Total |
|-------------|--------------|--------------|-------|-------|
|             |              | Normal Brain | Tumor |       |
| Radiologist | Normal Brain | 24           | 3     | 27    |
|             | Tumor        | 4            | 19    | 23    |
| Total       |              | 28           | 22    | 50    |
